# Supplementary material for: Enhanced electrochemical performance of Li–Co-BTC ternary metal–organic frameworks as cathode materials for lithium-ion batteries
Source: Royal Society of Chemistry journal article supplement (doi:10.1039/c8dt04863k), 2019-01-01
Supplement: c8dt04863k1.pdf [file c8dt04863k1.pdf]

## ESI

### **Enhanced electrochemical performance of Li-Co-BTC ternary metal-organic frameworks as cathode materials for lithium-ion batteries**

**Zhen-Qiang Du,<sup>ab†</sup> Yong-Peng Li,<sup>b†</sup> Xing-Xia Wang,<sup>b</sup> Juan Wang,<sup>\*a</sup> Quan-Guo Zhai<sup>\*b</sup>**

<sup>a</sup> Shaanxi Key Laboratory of Nanomaterials & Nanotechnology, School of mechanical & electrical engineering, Xi'an University of Architecture & Technology, Xi'an, Shaanxi, 710055, China,

<sup>b</sup> Key Laboratory of Macromolecular Science of Shaanxi Province, School of Chemistry & Chemical Engineering, Shaanxi Normal University, Xi'an, Shaanxi, 710062, China,

† These authors contributed equally to this work.

*\*Corresponding authors,*

*E-mail: juanwang168@gmail.com; zhaiqg@snnu.edu.cn*

**Table S1.** Bond lengths [Å] and angles [deg] for SNNU-74.

|                   |            |                  |          |
|-------------------|------------|------------------|----------|
| Co(1)-O(5)        | 1.9323(19) | Li(1)-O(1a)      | 1.950(5) |
| Co(1)-O(2a)       | 1.9335(18) | Li(1)-O(7)       | 2.078(5) |
| Co(1)-O(4b)       | 1.9513(17) | Li(2)-O(8)       | 1.904(6) |
| Co(1)-O(7)        | 1.9832(17) | Li(2)-O(6)       | 1.914(5) |
| Li(1)-O(11)       | 1.906(5)   | Li(2)-O(9)       | 1.973(6) |
| Li(1)-O(3b)       | 1.920(5)   | Li(2)-O(10)      | 1.885(6) |
|                   |            |                  |          |
| O(11)-Li(1)-O(3b) | 113.1(2)   | O(11)-Li(1)-O(7) | 112.2(2) |
| O(11)-Li(1)-O(1a) | 119.6(3)   | O(3b)-Li(1)-O(7) | 99.5(2)  |
| O(3b)-Li(1)-O(1a) | 108.0(2)   | O(1a)-Li(1)-O(7) | 102.1(2) |
| O(5)-Co(1)-O(2a)  | 110.81(9)  | O(10)-Li(2)-O(8) | 114.8(3) |
| O(5)-Co(1)-O(4b)  | 96.14(8)   | O(10)-Li(2)-O(6) | 115.0(3) |
| O(2a)-Co(1)-O(4b) | 108.90(9)  | O(8)-Li(2)-O(6)  | 113.0(3) |
| O(5)-Co(1)-O(7)   | 122.49(8)  | O(10)-Li(2)-O(9) | 109.4(3) |
| O(2a)-Co(1)-O(7)  | 113.39(9)  | O(8)-Li(2)-O(9)  | 103.1(3) |
| O(4b)-Co(1)-O(7)  | 102.36(8)  | O(6)-Li(2)-O(9)  | 99.5(3)  |

Symmetry codes:

a):  $-y+1/3, x-y-1/3, z-1/3$ ; b):  $-x+2/3, -y+1/3, -z+1/3$ .

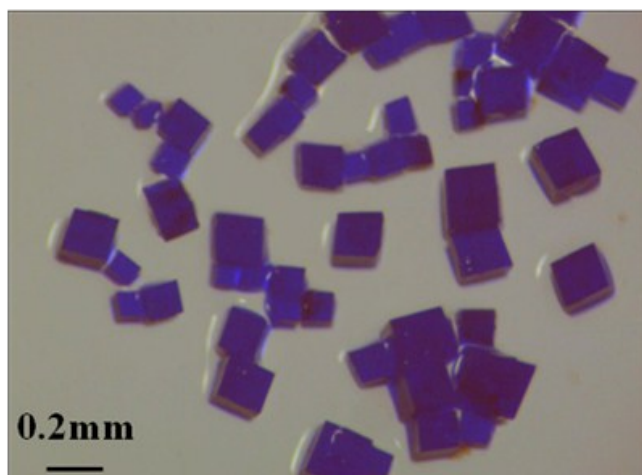

(a)

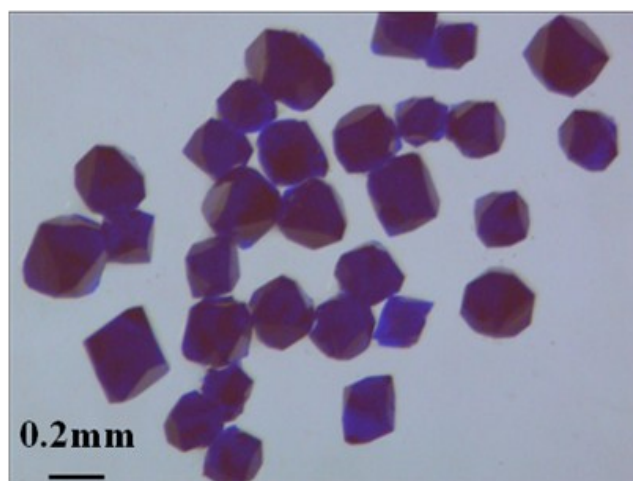

(b)

**Figure S1.** The photos of SNNU-73 (a) and -74 (b).

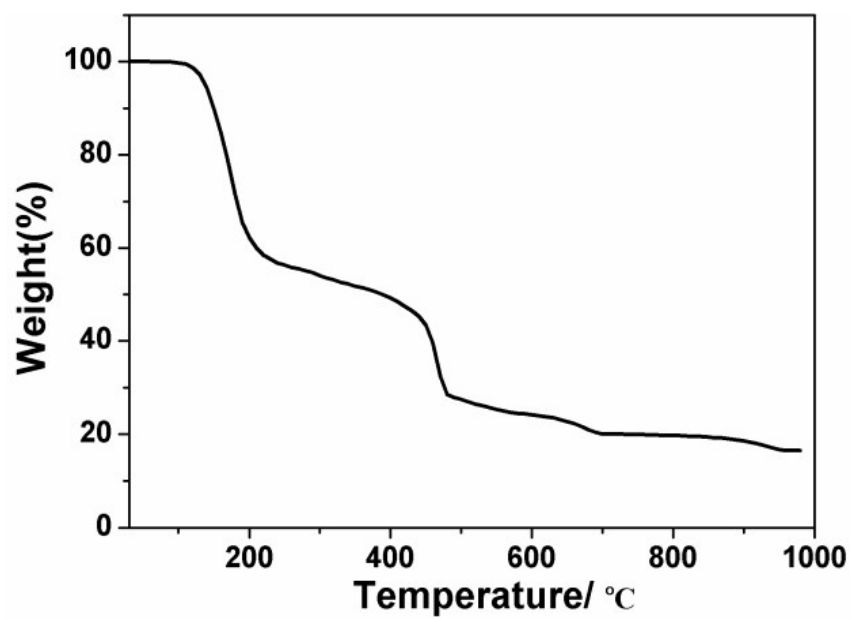

(a)

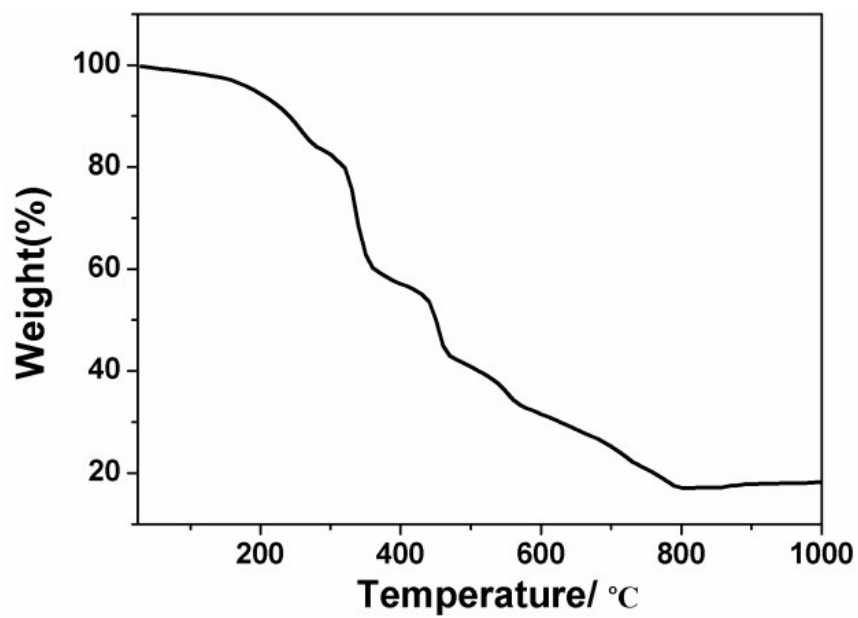

(b)

Figure S2. TGA curves of SNU-73 (a) and -74 (b).

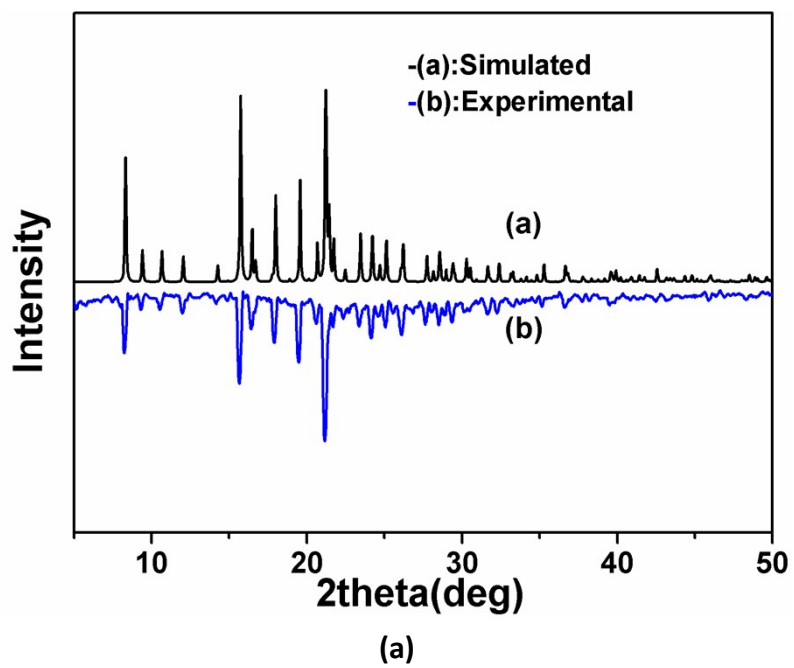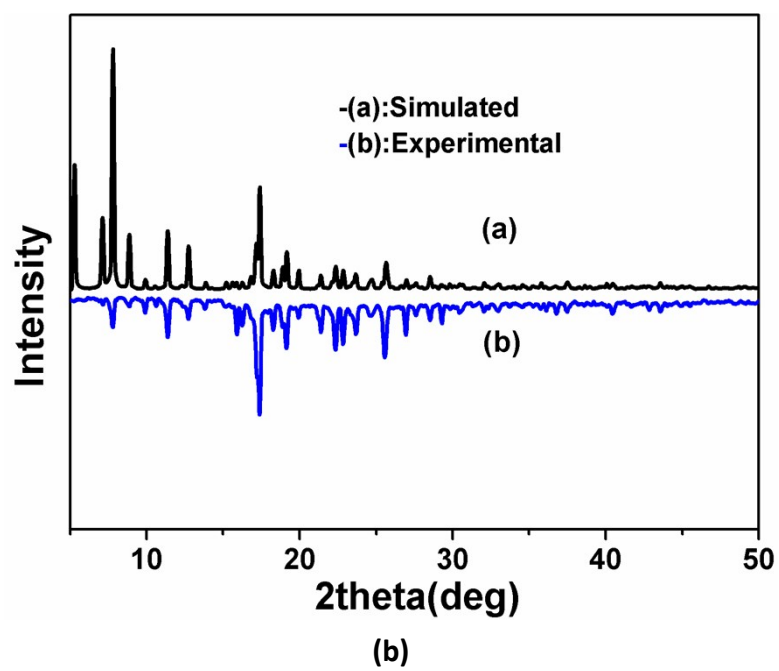

**Figure S3.** The PXRD pattern of SNNU-73 (a) and -74 (b).

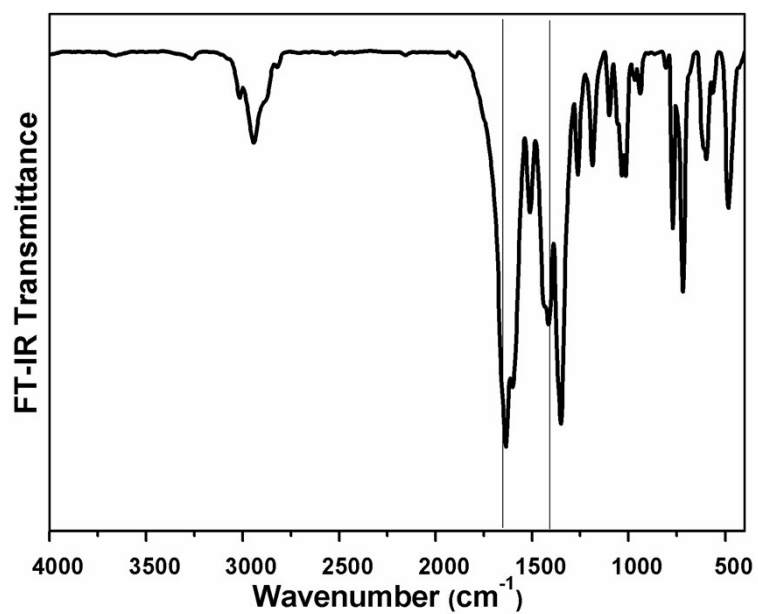

(a)

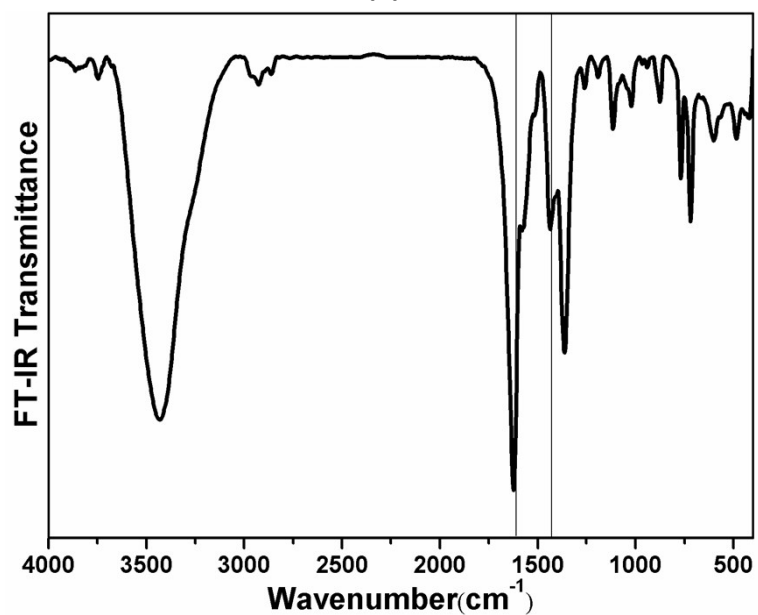

(b)

**Figure S4.** FT-IR spectra of SNU-73 (a) and -74 (b). The absorption bands in the range of 1340-1620 cm<sup>-1</sup> are assigned to the carboxylate groups.

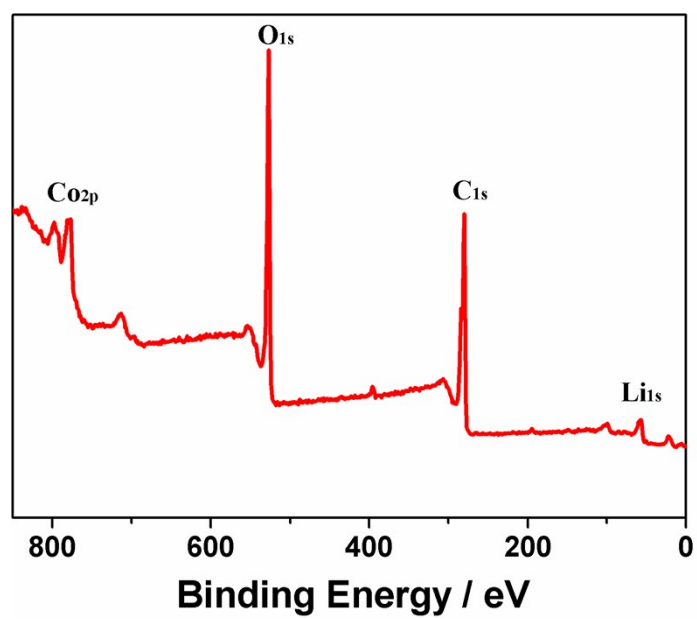

(a)

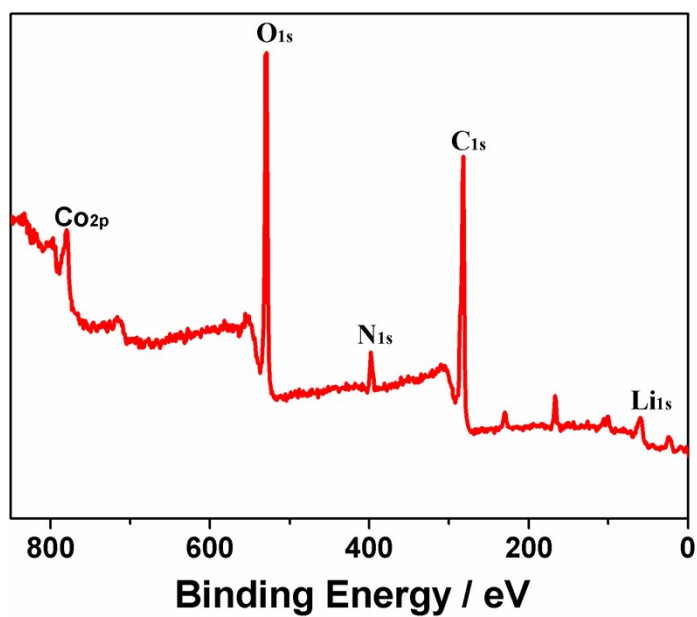

(b)

**Figure S5.** The XPS pattern of SNU-73 (a) and -74 (b).

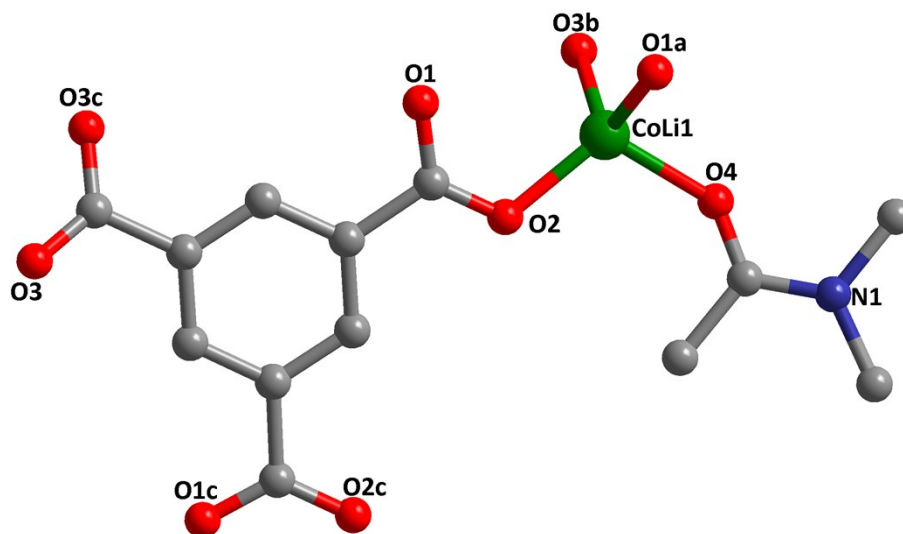

**Figure S6.** The coordination environments of mixed Co/Li sites in SNNU-73.

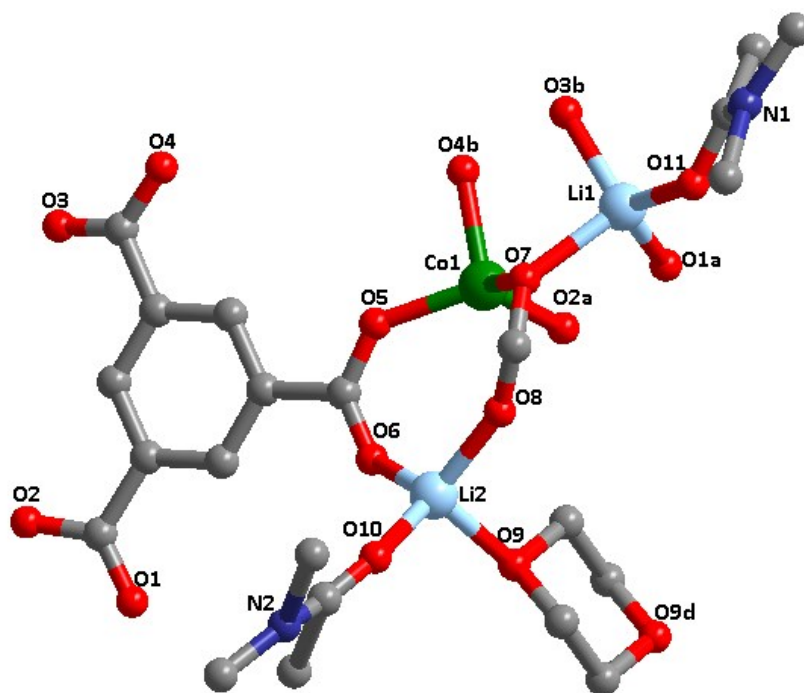

**Figure S7.** The coordination environments of discrete Co(II) and Li(I) sites in SNNU-74.



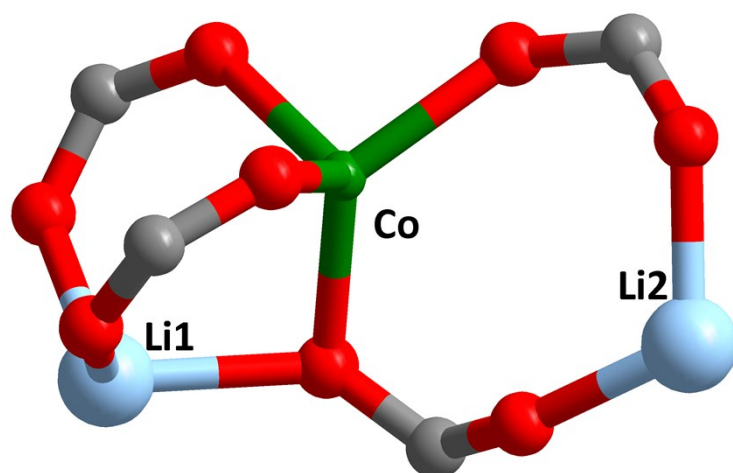

**Figure S8.** The  $[\text{CoLi}_2(\text{COO})_4]$  cluster in SNU-74.

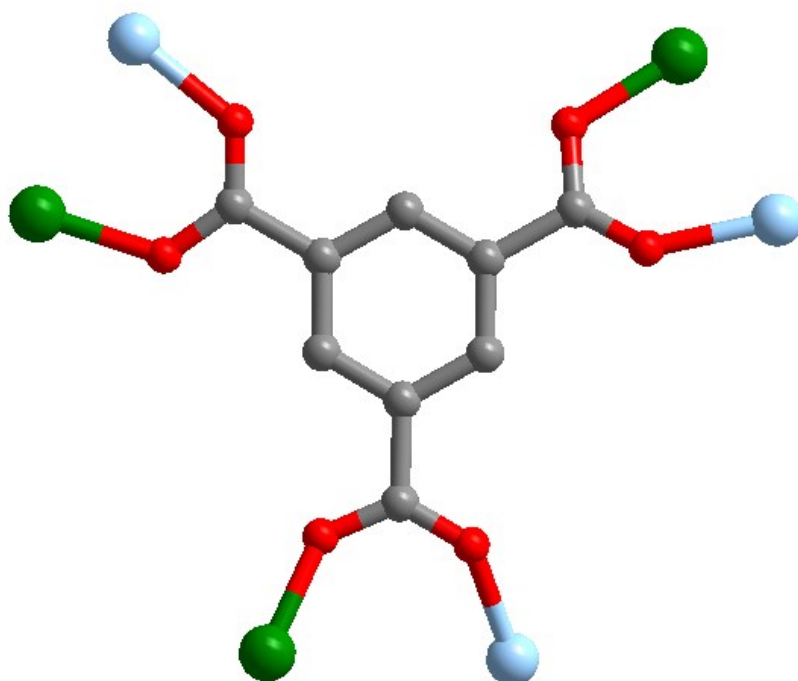

**Figure S9.** The linkage of  $\text{H}_3\text{BTC}$  ligands in SNU-74.

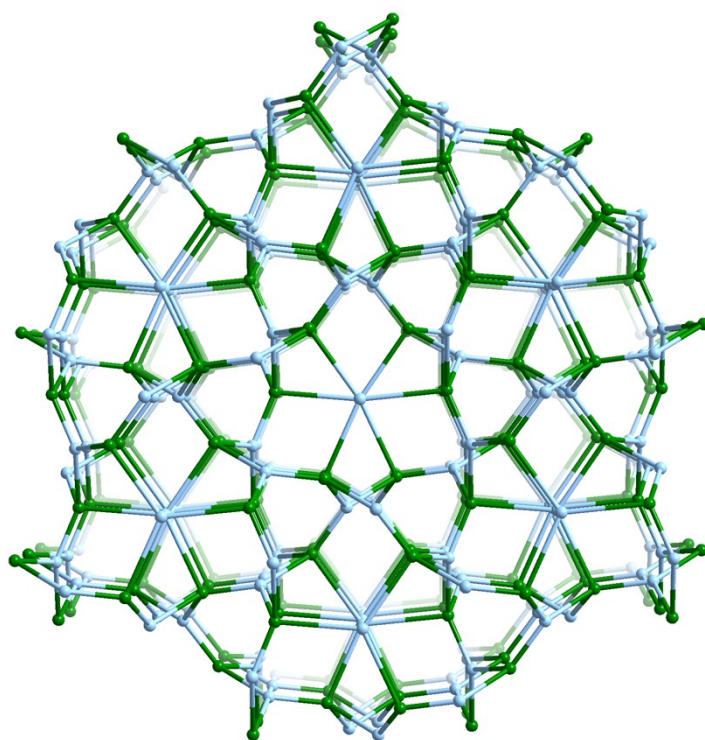

**Figure S10.** The 3,3,5-connected topological net of SNU-74 viewed along the *c* axis.

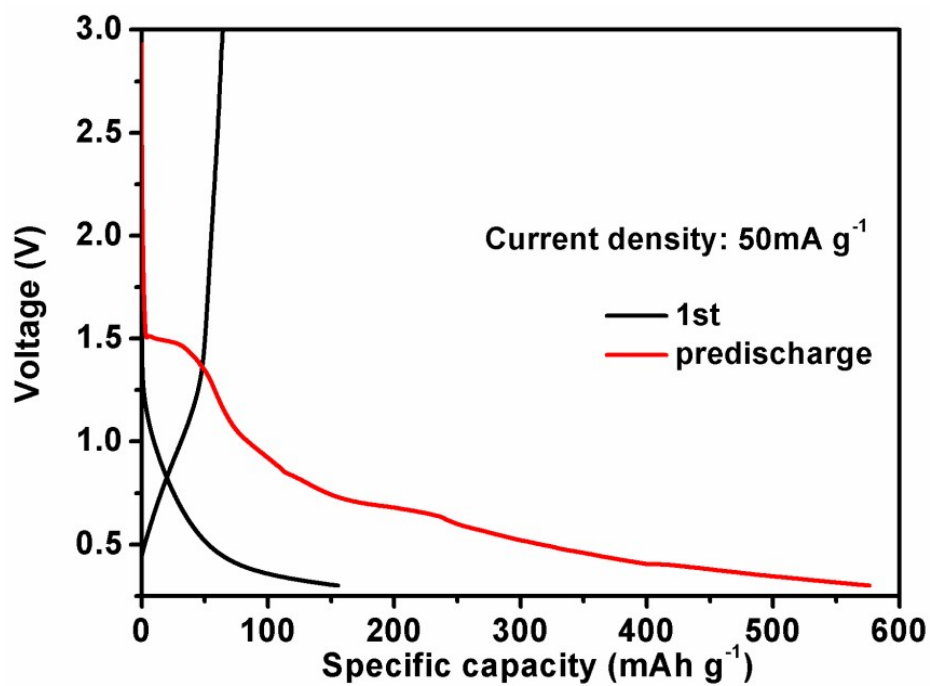

Figure S11. The predischarge curve of SNNU-73 electrode.

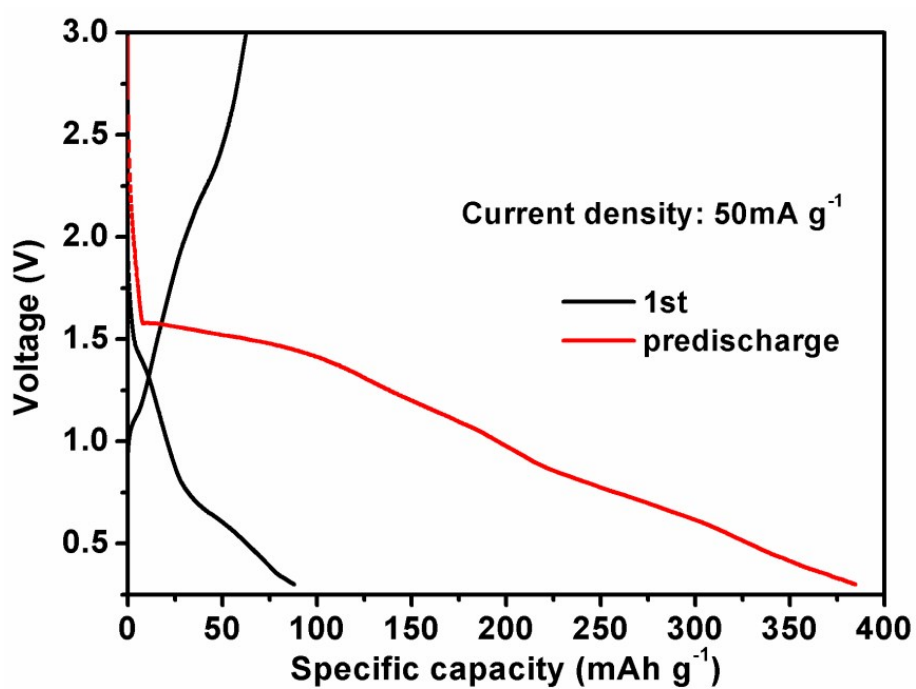

Figure S12. The predischarge curve of SNNU-74 electrode.
